# Supplementary material for: Shape-controlled growth of metal nanoparticles: an atomistic view
Source: Royal Society of Chemistry journal article supplement (doi:10.1039/c5cp03902a), 2015-11-25
Supplement: c5cp03902a1.pdf [file c5cp03902a1.pdf]

Electronic Supplementary Information for

## Shaped-Controlled Growth of Metal Nanoparticles: An Atomistic View

Mine Konuk

*Department of Physics, Istanbul Technical University, Maslak 34469 Istanbul, Turkey*

*Faculty of Science and Letters, Piri Reis University, Tuzla 34940 Istanbul, Turkey*

Sondan Durukanoglu

*Faculty of Engineering and Natural Sciences,*

*Sabanci University, Tuzla 34950 Istanbul, Turkey*

*Nanotechnology Research and Application Center,*

*Sabanci University, Tuzla 34950 Istanbul, Turkey*

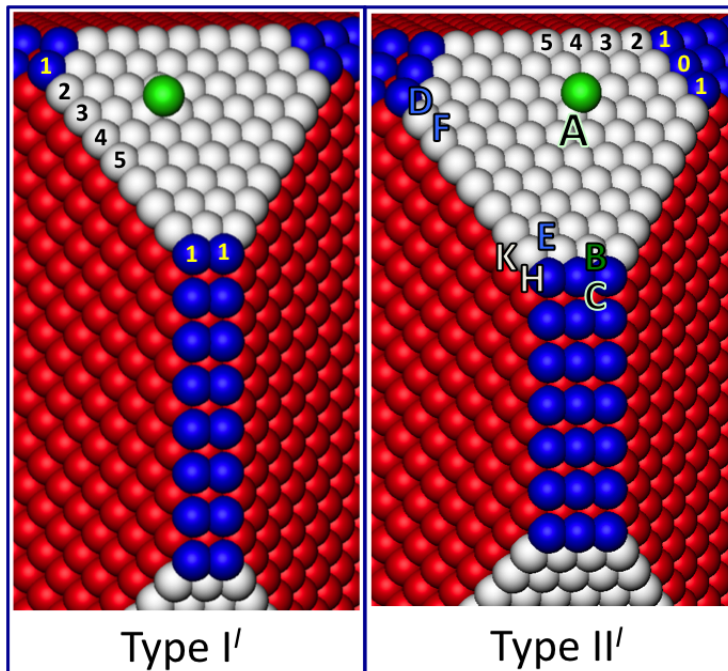

Fig. S1. The geometries of larger cubic Ag nano-clusters. The length of a side for each computational cell is 6.1 nm. The capital letters represent the selected adsorption sites and regarding adsorption energies are listed in Table S1.

Table S1. Adsorption energies, relative to the energy for the center site A, of various sites on the facets of cubic Ag clusters. For the selected adsorption sites (indicated in parentheses) see Fig. S1.

| Adsorption site                                                 | Type I | Type II | Type I' | Type II' |
|-----------------------------------------------------------------|--------|---------|---------|----------|
| Center on $\{111\}$ facet, <i>fcc</i> (A)                       | 0.000  | 0.000   | 0.000   | 0.000    |
| $\{110\}$ / $\{100\}$ submit on $\{111\}$ facet, <i>hcp</i> (D) | -0.012 | -0.016  | -0.015  | -0.017   |
| Edge on $\{111\}$ facet, <i>fcc</i> (E)                         | -0.017 | -0.021  | -0.018  | -0.018   |
| Edge on $\{111\}$ facet, <i>hcp</i> (F)                         | -0.004 | —       | -0.006  | -0.007   |
| Corner on $\{111\}$ facet, <i>fcc</i> (B)                       | -0.024 | -0.018  | -0.023  | -0.014   |
| Corner on $\{110\}$ facet, (C)                                  | -0.541 | -0.526  | -0.540  | -0.524   |
| Edge on $\{100\}$ facet close to $\{110\}$ / $\{100\}$ , (H)    | -0.269 | -0.270  | -0.268  | -0.268   |
| Edge on $\{100\}$ facet, (K)                                    | -0.260 | —       | -0.258  | -0.258   |

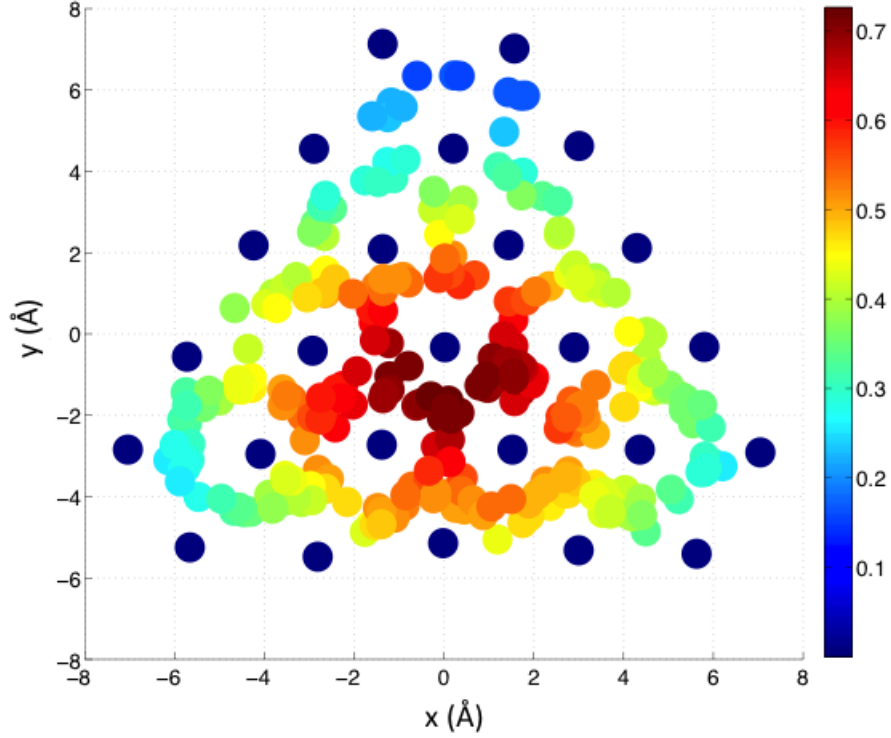

Fig. S2. The landing position distribution of adatoms on the  $\{111\}$  facet of Type I system. Dark blue circles denote atomic positions of the  $\{111\}$  facet whereas the coded colors, ranging from light blue to red, represent the probability of the adatom landing on specific sites on the corner facet. The relation between the color code and the probability is given by the scale on the right. Statistical distribution is over 300 repeated single atom events at 500 K.

Table S2. Average diffusion times for number of atoms resulting from 300 repeated simulations on various clusters type at 500 K.

| 500K                | Type I         | Type II       | Type I'        | Type II'        |
|---------------------|----------------|---------------|----------------|-----------------|
| From (111) to (110) | (203) 254.1 ps | (282) 76.4 ps | (196) 646.6 ps | (264) 406.25 ps |
| From (111) to (100) | (97) 252.7 ps  | (18) 106.9 ps | (104) 636.8 ps | (36) 512.90 ps  |

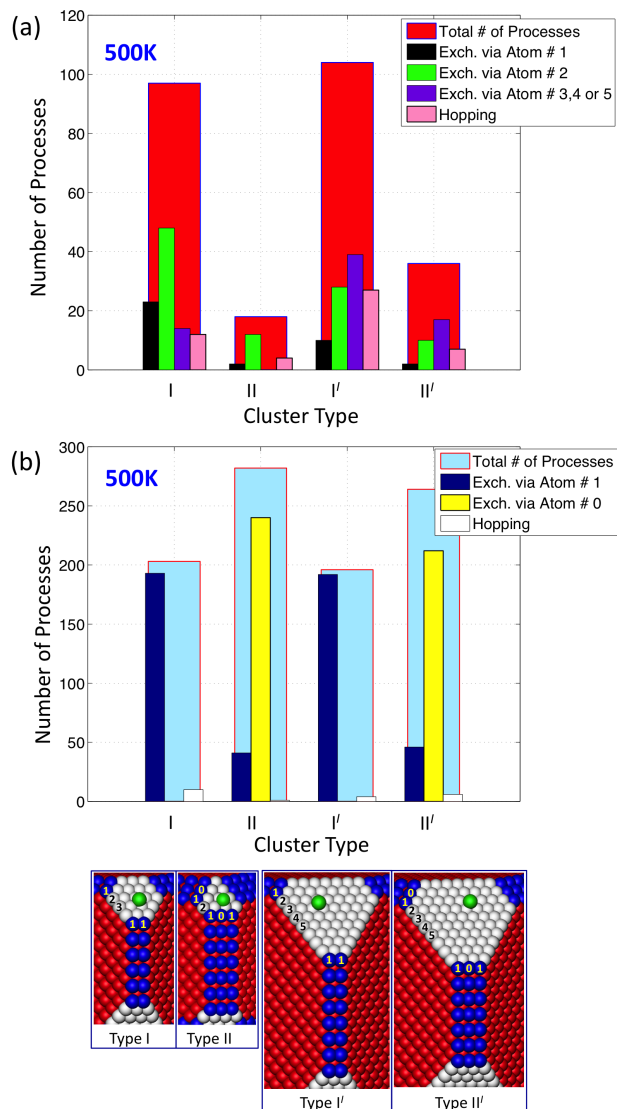

Fig. S3. Statistical characteristics of 300 repeated events on various cluster types at 500 K: (a) number of diffusion events from  $\{111\}$  to  $\{100\}$  facets, (b) number of diffusion events from  $\{111\}$  to  $\{110\}$  facets, (c) corner views of the cluster types.

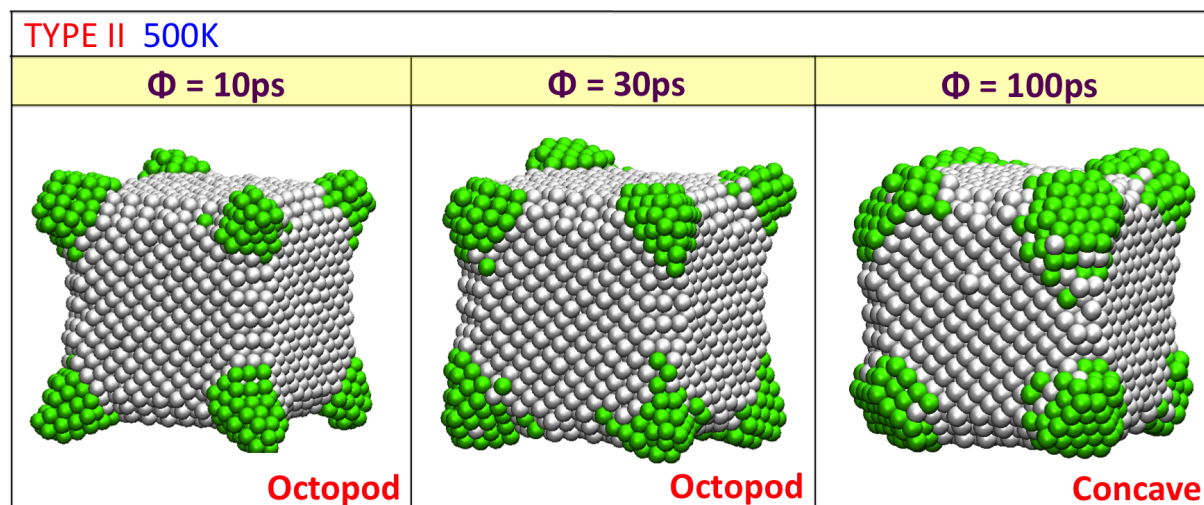

Fig. S4. Two specific growth modes of cubic-Ag Type II system obtained at 500 K: Octopod with deposition rates 10 ps or 30 ps and concave with a deposition rate of each atom 100 ps.
